# Supplementary material for: Mulberry polyphenols restored both small and large intestinal microflora indb/dbmice, potentially alleviating type 2 diabetes
Source: Royal Society of Chemistry journal article supplement (doi:10.1039/d4fo01291g), 2024-01-01
Supplement: d4fo01291g1.pdf [file d4fo01291g1.pdf]

**Supplementary Table 1** Changes in the dominant gut microbiota in the small intestine and large intestine of mice in the N, Met250, MP400, and MP900 groups compared to the C group

| Groups          | Microbiota findings   |                                                                                                                                                                                                   |                                                                                                                                                                                                                                                                                                                                                                |                                                                                                                                                             |
|-----------------|-----------------------|---------------------------------------------------------------------------------------------------------------------------------------------------------------------------------------------------|----------------------------------------------------------------------------------------------------------------------------------------------------------------------------------------------------------------------------------------------------------------------------------------------------------------------------------------------------------------|-------------------------------------------------------------------------------------------------------------------------------------------------------------|
|                 | No significant change | Increase                                                                                                                                                                                          | Decrease                                                                                                                                                                                                                                                                                                                                                       |                                                                                                                                                             |
| Small intestine |                       | ↑ <i>Bacteroidetes</i> ,<br>↑ <i>Bacteroidales_S24-7</i> ,<br>↑ <i>Bacteroidales</i> ,<br>↓ <i>Bacteroidetes</i> , ↑ <i>Bacilli</i> ,<br>↓ <i>Bacteroidales_S24-7</i> ,<br>↓ <i>Bacteroidales</i> | ↓ <i>Actinobacteria</i> , ↓ <i>Firmicutes</i> , ↓ <i>Bacilli</i> ,<br>↓ <i>Nocardiaceae</i> , ↓ <i>Corynebacteriales</i> , ↓ <i>Lactobacillales</i> ,<br>↓ <i>Rhodococcus</i><br>↓ <i>Actinobacteria</i> , ↓ <i>Nocardiaceae</i> ,<br>↓ <i>Corynebacteriales</i> , ↓ <i>Lactobacillales</i> , ↓ <i>Rhodococcus</i>                                             |                                                                                                                                                             |
|                 |                       | MP400                                                                                                                                                                                             |                                                                                                                                                                                                                                                                                                                                                                |                                                                                                                                                             |
|                 |                       | MP900                                                                                                                                                                                             | ~ <i>Firmicutes</i>                                                                                                                                                                                                                                                                                                                                            |                                                                                                                                                             |
|                 |                       | Met250                                                                                                                                                                                            |                                                                                                                                                                                                                                                                                                                                                                |                                                                                                                                                             |
| Large intestine |                       | ↑ <i>Bacteroidetes</i> ,<br>↑ <i>Bacteroidales_S24-7</i> ,<br>↑ <i>Bacteroidales</i> ,<br>↑ <i>Bacteroidetes</i> ,<br>↑ <i>Bacteroidales_S24-7</i> ,<br>↑ <i>Bacteroidales</i>                    | ↓ <i>Actinobacteria</i> , ↓ <i>Firmicutes</i> , ↓ <i>Bacilli</i> ,<br>↓ <i>Nocardiaceae</i> , ↓ <i>Corynebacteriales</i> , ↓ <i>Lactobacillales</i> ,<br>↓ <i>Rhodococcus</i><br>↓ <i>Actinobacteria</i> , ↓ <i>Firmicutes</i> , ↓ <i>Bacilli</i> ,<br>↓ <i>Nocardiaceae</i> , ↓ <i>Corynebacteriales</i> , ↓ <i>Lactobacillales</i> ,<br>↓ <i>Rhodococcus</i> |                                                                                                                                                             |
|                 |                       | MP400                                                                                                                                                                                             | ~ <i>Clostridia</i> ,<br>~ <i>Bacteroidales_S24-7</i>                                                                                                                                                                                                                                                                                                          | ↓ <i>Firmicutes</i> , ↓ <i>Bacilli</i> , ↓ <i>Lactobacillaceae</i> ,<br>↓ <i>Lactobacillales</i> , ↓ <i>Lactobacillus</i> ,<br>↓ <i>Ruminiclostridium_5</i> |
|                 | MP900                 |                                                                                                                                                                                                   | ↓ <i>Bacteroidetes</i> , ↑ <i>Bacteroidia</i> ,<br>↓ <i>Bacteroidales_S24-7</i> ,<br>↓ <i>Bacteroidales</i> , ↑ <i>Alloprevotella</i><br>↓ <i>Firmicutes</i> , ↓ <i>Bacilli</i> , ↓ <i>Clostridia</i> ,<br>↓ <i>Lactobacillaceae</i> , ↓ <i>Lactobacillales</i> , ↓ <i>Lactobacillus</i> ,<br>↓ <i>Ruminiclostridium_5</i>                                     |                                                                                                                                                             |
|                 | Met250                | ~ <i>Bacteroidales_S24-7</i>                                                                                                                                                                      | ↑ <i>Bacteroidetes</i> , ↑ <i>Bacteroidia</i> ,<br>↑ <i>Bacteroidales</i> , ↑ <i>Alloprevotella</i><br>↓ <i>Firmicutes</i> , ↓ <i>Bacilli</i> , ↓ <i>Clostridia</i> ,<br>↓ <i>Lactobacillaceae</i> , <i>Lactobacillales</i> , ↓ <i>Lactobacillus</i> ,<br>↓ <i>Ruminiclostridium_5</i>                                                                         |                                                                                                                                                             |
|                 | N                     |                                                                                                                                                                                                   | ↑ <i>Bacteroidetes</i> , ↑ <i>Bacteroidia</i> ,<br>↑ <i>Bacteroidales_S24-7</i> ,<br>↑ <i>Bacteroidales</i> , ↑ <i>Alloprevotella</i><br>↓ <i>Firmicutes</i> , ↓ <i>Bacilli</i> , ↓ <i>Clostridia</i> ,<br>↓ <i>Lactobacillaceae</i> , <i>Lactobacillales</i> , ↓ <i>Lactobacillus</i> ,<br>↓ <i>Ruminiclostridium_5</i>                                       |                                                                                                                                                             |
|                 |                       |                                                                                                                                                                                                   |                                                                                                                                                                                                                                                                                                                                                                |                                                                                                                                                             |
